# Supplementary material
Source: PubMed Central journal article supplement (PMC3121520)

## Supplementary Figure Legends

**Supplementary Figure 1** Lineweaver-Burk plot for the kinetic constants of the wild type *Tb*ADAT2/3 heterodimer. The  $K_m$  is calculated in micromolar ( $\mu\text{M}$ ) while the velocity is calculated in pmol per minute (pmol/min). The equation for the line is shown along the x-axis ( $y = 2.63x + 4.40$ ).

**Supplementary Figure 2** *Tb*ADAT2 binds tRNA with a much lower affinity than the wild type *Tb*ADAT2/3 heterodimer. 6xHis-tagged *Tb*ADAT2 in the absence of ADAT3 was over-expressed in *E. coli*s and purified via  $\text{Ni}^{2+}$  affinity. Purified protein was stored as aliquots at  $-80^\circ\text{C}$  in ADAT2/3 storage buffer (50 mM Hepes pH 8, 100 mM KCl, 1mM  $\text{MgCl}_2$ , 0.1 mM EDTA, and 2 mM DTT) with 20% glycerol. Increasing concentrations of ADAT2 (0 to 2.5  $\mu\text{M}$ ) was incubated with end radiolabeled  $\text{G}_{34}$  containing transcript tRNA<sup>Val</sup>. The “no protein” lane is a mock reaction in which no protein was added to the RNA; this serves as a marker for the migration of free tRNA in the gel. Arrows indicate the free tRNA and the protein-tRNA complex.

**Supplementary Figure 3** Structural model supports the possibility of an alternative inter-subunit zinc coordination in *Tb*ADAT2/3. Using the ADATa (TadA) homodimer (co-crystallized with tRNA anticodon loop) from *Staphylococcus aureus* (2B3J in the Protein Data Bank) as a modeling template, two ADAT2/3 heterodimer models were built using the FRankenstein’s Monster method. (A) The model in this panel represents the heterodimer most like the ADATa homodimer in that each subunit individually coordinates  $\text{Zn}^{2+}$  (intra-subunit coordination). (B) This panel represents an alternative “swapped” model, which was built by exchanging parts of ADAT2 and ADAT3 containing the HXE and CXXC motifs; this model supports the possibility of inter-subunit Zn-coordination. The models are colored by conservation: blue is invariant, red is highly variable, yellow and green are intermediate. Magenta spheres represent  $\text{Zn}^{2+}$ . The C-terminal ends (COOH) are label for each subunit. (C) Superposition of the two models in (A) and (B) reveals only minor structural difference between the two models. The intra-subunit model (A) is shown in orange while the inter-subunit “swapped” model (B) is shown in teal. Also highlighted are the C-termini of each protein subunit (denoted by COOH). (D) Superposition of the active sites from the two different models shows the active sites are nearly identical. The figure is colored as in (C).

Lineweaver-Burk Plot

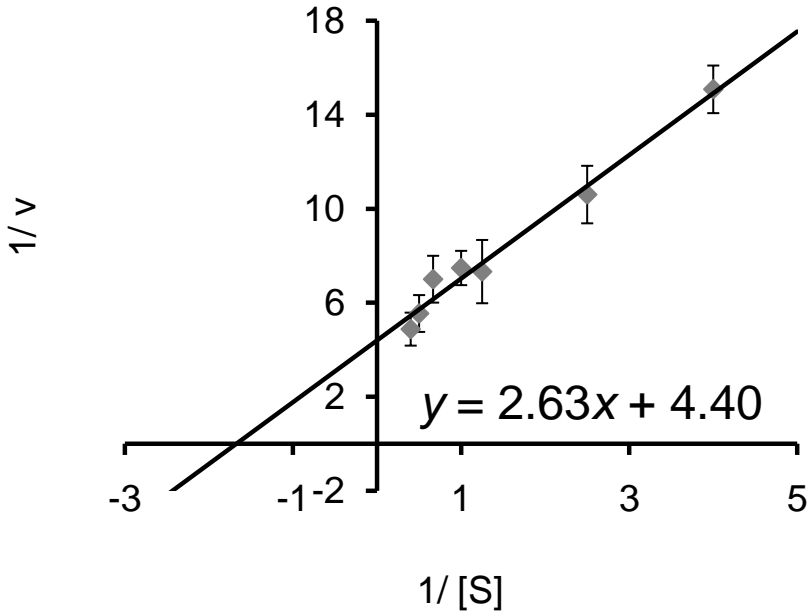

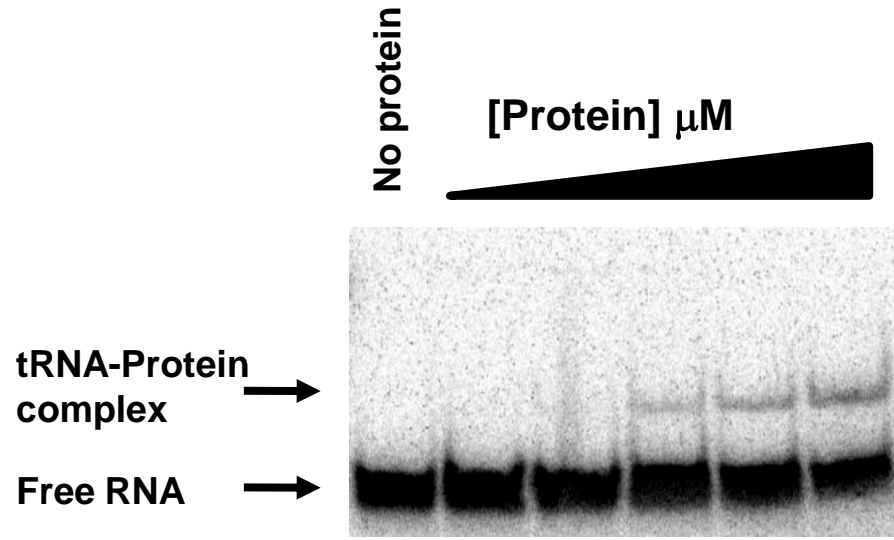

**A** Active site with intra-subunit  $Zn^{2+}$  coordination

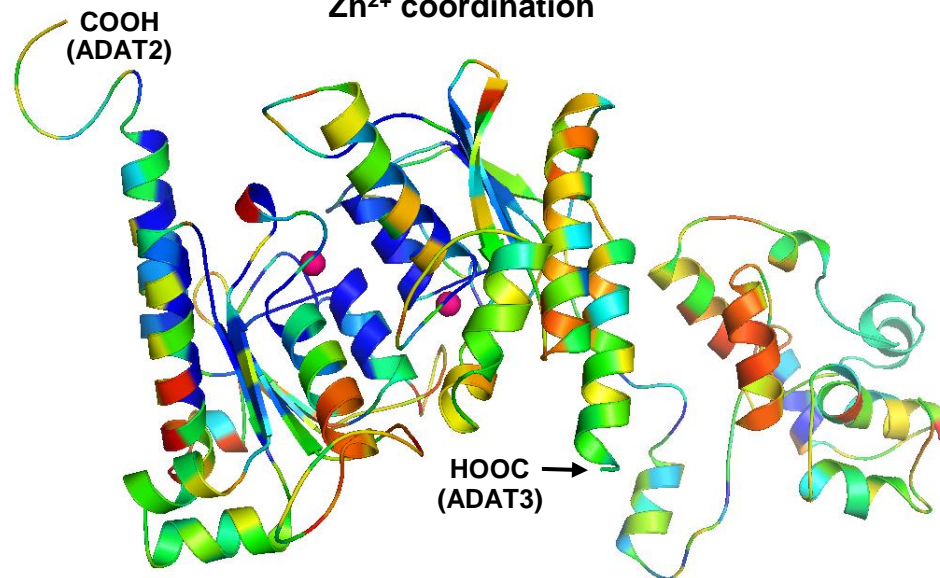

**B** Active site with alternative inter-subunit  $Zn^{2+}$  coordination

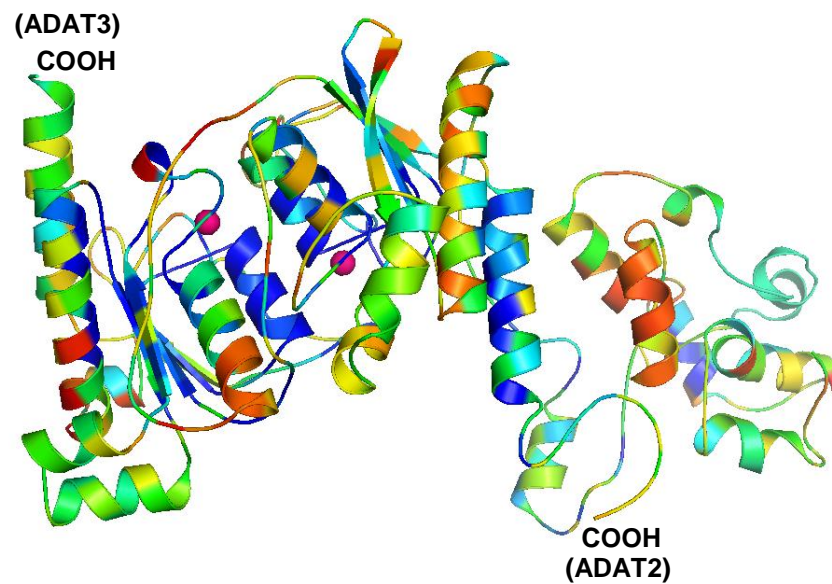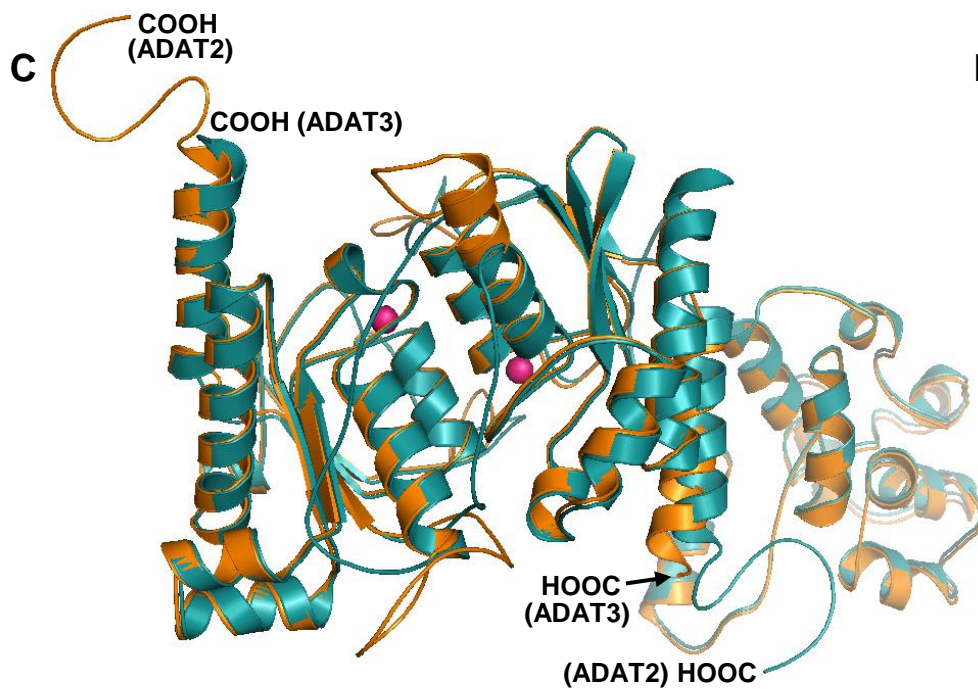

**D**

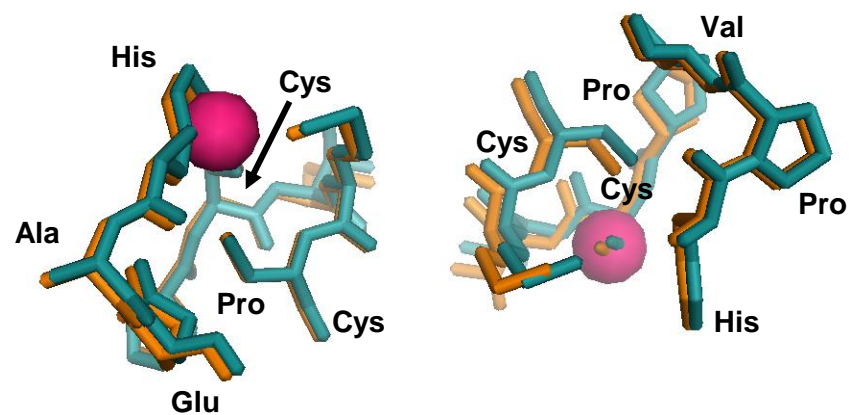

Supplement: supp_M111.243568_jbc.M111.243568-1.pdf [file supp_M111.243568_jbc.M111.243568-1.pdf]
